# Supplementary material for: Macro Minerals and Trace Elements in Milk of Dairy Buffaloes and Cows Reared in Mediterranean Areas
Source: MDPI journal article supplement (doi:10.3390/beverages8030051), 2022-08-25
Supplement: s1 [file s1]

## Supplementary Material

**Table S1.** Macro mineral and trace element concentrations in dietary ingredients and drinking water.

| Element  | Corn silage | Alfalfa hay | Meadow hay | Corn  | Barley | Soybean meal | Mineral/vitamin supplement | Probiotic supplement | Calcium carbonate | Sodium chloride | Sodium bicarbonate | Water <sup>a</sup> |
|----------|-------------|-------------|------------|-------|--------|--------------|----------------------------|----------------------|-------------------|-----------------|--------------------|--------------------|
| g/kg DM  |             |             |            |       |        |              |                            |                      |                   |                 |                    |                    |
| Ca       | 2.04        | 14.5        | 9.38       | 0.76  | 0.87   | 4.17         | 92.4                       | 5.04                 | 401.0             | 0.13            | --                 | 84.2               |
| P        | 1.59        | 1.24        | 1.61       | 4.00  | 3.20   | 8.15         | 2.10                       | 3.62                 | --                | --              | --                 | 0.02               |
| K        | 8.30        | 28.1        | 25.0       | 5.08  | 6.02   | 26.5         | 4.46                       | 4.39                 | --                | 0.10            | 0.20               | 4.77               |
| Na       | 0.14        | 0.28        | 0.43       | 0.07  | 2.21   | 0.07         | 8.44                       | 3.43                 | --                | 380.0           | 258.0              | 58.7               |
| Mg       | 1.06        | 2.53        | 1.66       | 1.42  | 1.31   | 3.70         | 12.5                       | 3.43                 | 3.01              | 3.80            | --                 | 26.5               |
| S        | 0.79        | 2.82        | 0.92       | 1.14  | 1.15   | 4.50         | 4.49                       | 32.2                 | --                | --              | --                 | 28.2               |
| mg/kg DM |             |             |            |       |        |              |                            |                      |                   |                 |                    |                    |
| Zn       | 21.2        | 22.6        | 20.9       | 49.7  | 72.2   | 61.9         | 47447                      | 1231                 | --                | --              | --                 | 43.4               |
| Fe       | 51.8        | 139.2       | 64.8       | 152.9 | 87.1   | 222.0        | 22086                      | 670                  | 33.6              | 0.99            | 4.38               | 1.61               |
| Cu       | 4.82        | 9.47        | 7.16       | 4.93  | 8.47   | 23.3         | 4734                       | 77.2                 | 1.11              | 0.61            | 0.10               | 2.72               |
| Mn       | 22.4        | 25.3        | 18.4       | 16.4  | 35.2   | 36.5         | 22033                      | 924                  | 19.2              | 23.8            | --                 | 0.26               |
| Se       | 0.05        | 0.11        | 0.12       | 0.10  | 0.15   | 0.34         | 115.8                      | 3.00                 | --                | --              | --                 | 0.88               |
| Mo       | 0.47        | 1.85        | 12.7       | 1.14  | 2.07   | 14.0         | 1.25                       | 0.84                 | --                | --              | --                 | 0.81               |
| Co       | 0.02        | 0.09        | 0.14       | 0.06  | 0.13   | 0.19         | 97.6                       | 4.21                 | 0.06              | 0.08            | 0.01               | 0.09               |
| Li       | 0.07        | 1.12        | 0.65       | 0.19  | 0.08   | 0.09         | 5.93                       | 4.27                 | 0.07              | 0.15            | 3.59               | 23.2               |
| B        | 4.58        | 37.2        | 24.2       | 2.45  | 2.32   | 51.1         | 17.0                       | 2.39                 | 0.28              | 0.40            | 25.0               | 161.4              |
| Ti       | 0.81        | 2.85        | 1.23       | 2.24  | 1.15   | 3.17         | 25.4                       | 5.93                 | 0.42              | --              | --                 | 0.23               |
| Rb       | 2.58        | 30.6        | 5.51       | 2.33  | 2.82   | 17.7         | 4.90                       | 4.73                 | 0.01              | 0.02            | 0.09               | 0.82               |
| Sr       | 7.84        | 37.6        | 85.5       | 2.58  | 3.10   | 8.35         | 50.5                       | 6.23                 | 144.7             | 10.1            | --                 | 753.0              |

<sup>a</sup> Concentrations in drinking water are expressed as mg/L for macro minerals and µg/L for trace elements. DM = dry matter
